# Supplementary material
Source: PubMed Central journal article supplement (PMC4681524)
Supplement: NIHMS284761-supplement-Sup_Fig_1.pdf [file NIHMS284761-supplement-Sup_Fig_1.pdf]

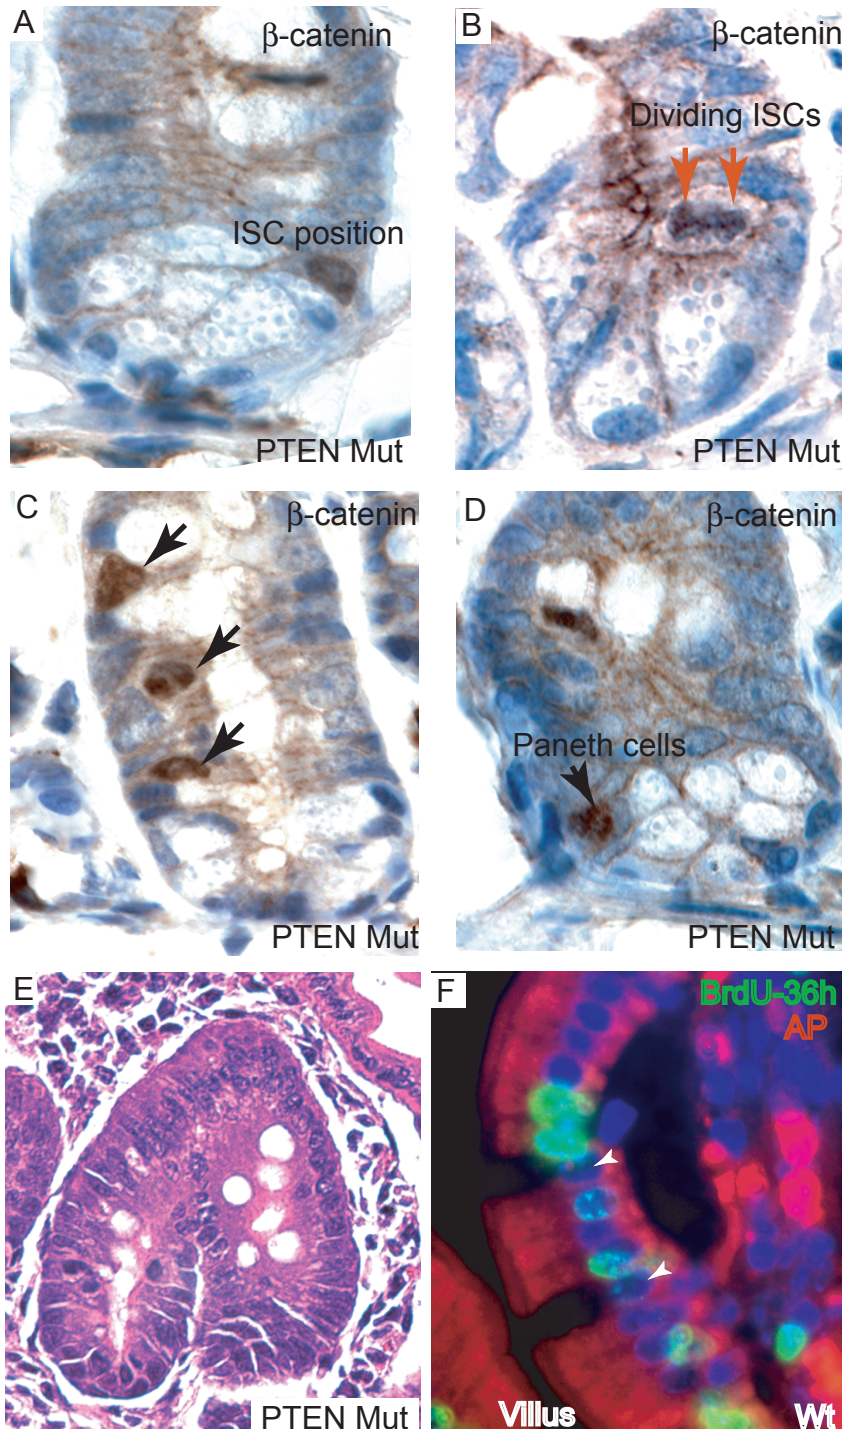

**Supplementary Figure I.** Distribution patterns of cells with nuclear localized  $\beta$ -catenin and migrating enterocytes.

A-D. Nuclearly localized  $\beta$ -catenin can be detected in ISCs (A-C), Paneth (D), and a few cells in the middle or upper regions of the crypt. E. Representative crypt fission as seen in the PTEN mutant mouse with bifurcate crypts. F. Association of ALP with BrdU-chased cells. White arrows indicate BrdU-negative and ALP-negative cells in the villus region.
